# Supplementary material for: Dinuclear Lanthanide Compound as a Promising Luminescent Probe for Al3+ Ions
Source: MDPI journal article supplement (doi:10.3390/molecules27248761), 2022-12-10
Supplement: s1 [file s1]

## Supporting Information

### Dinuclear Lanthanide Compound as a Promising Luminescent Probe for $\text{Al}^{3+}$ Ions

Zhi Chen<sup>1,\*</sup>, Yinghao Xie<sup>1</sup>, Zhanbo Li<sup>2</sup> and Tao Lin<sup>2,\*</sup>

<sup>1</sup>College of Chemistry and Environmental Engineering, Shenzhen University, Shenzhen, 518071, China

<sup>2</sup>College of New Materials and New Energies, Shenzhen Technology University, Shenzhen 518118, China

\* Correspondence: zhi.chen@szu.edu.cn (Z.C.); lintao@sztu.edu.cn (T.L.)

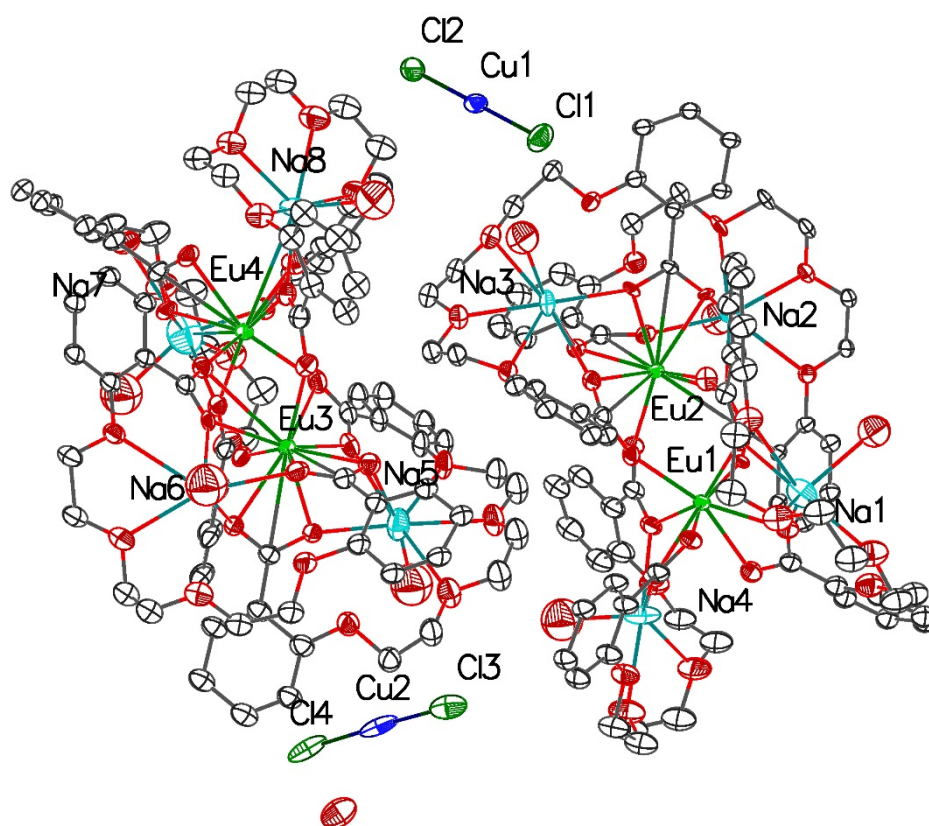

**Figure S1.** ORTEP view of the X-ray crystal structure of compound **1**. Atoms are shown as 30% thermal ellipsoids. Hydrogen atoms are omitted for clarity.

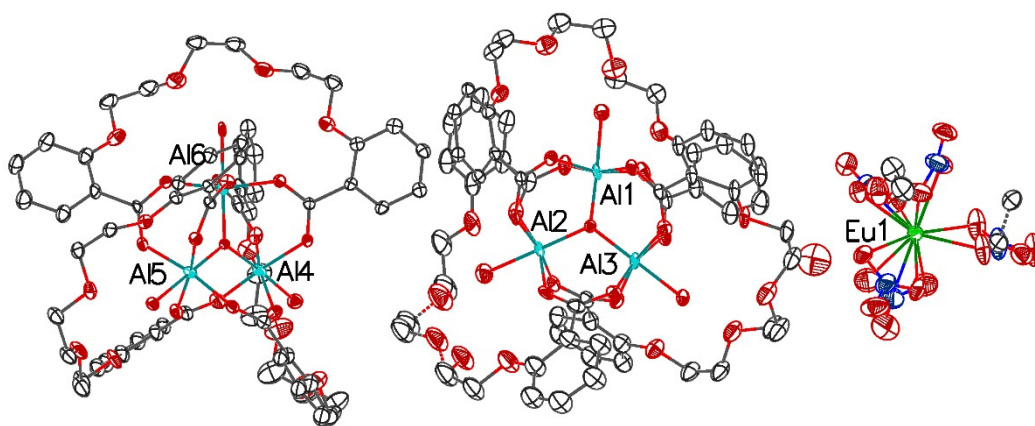

**Figure S2.** ORTEP view of the X-ray crystal structure of compound **2**. Atoms are shown as 30% thermal ellipsoids. Hydrogen atoms are omitted for clarity.

**Table S1.** Crystal data and structure refinement for **1** and **2**.

| Identification code                      | <b>1</b>                                                                                            | <b>2</b>                                                                             |
|------------------------------------------|-----------------------------------------------------------------------------------------------------|--------------------------------------------------------------------------------------|
| Empirical formula                        | C <sub>80</sub> H <sub>89</sub> Cl <sub>3</sub> CuEu <sub>2</sub> Na <sub>4</sub> O <sub>36.5</sub> | C <sub>122</sub> H <sub>139</sub> Al <sub>6</sub> EuN <sub>5</sub> O <sub>72.5</sub> |
| Formula weight                           | 2200.28                                                                                             | 3149.21                                                                              |
| Temperature/K                            | 120(2)                                                                                              | 120(2)                                                                               |
| Crystal system                           | triclinic                                                                                           | triclinic                                                                            |
| Space group                              | <i>P</i> $\bar{1}$                                                                                  | <i>P</i> $\bar{1}$                                                                   |
| <i>a</i> /Å                              | 16.0944(8)                                                                                          | 10.8250(6)                                                                           |
| <i>b</i> /Å                              | 22.3421(10)                                                                                         | 20.320(3)                                                                            |
| <i>c</i> /Å                              | 26.5207(15)                                                                                         | 32.429(3)                                                                            |
| $\alpha$ /°                              | 93.324(4)                                                                                           | 90.834(8)                                                                            |
| $\beta$ /°                               | 105.705(5)                                                                                          | 90.347(6)                                                                            |
| $\gamma$ /°                              | 98.828(4)                                                                                           | 102.008(8)                                                                           |
| Volume/Å <sup>3</sup>                    | 9021.8(8)                                                                                           | 6976.1(13)                                                                           |
| <i>Z</i>                                 | 4                                                                                                   | 2                                                                                    |
| $\rho_{\text{calc}}$ g/cm <sup>3</sup>   | 1.620                                                                                               | 1.499                                                                                |
| $\mu$ /mm <sup>-1</sup>                  | 1.802                                                                                               | 0.594                                                                                |
| <i>F</i> (000)                           | 4444.0                                                                                              | 3254.0                                                                               |
| Crystal size/mm <sup>3</sup>             | 0.4 × 0.1 × 0.1                                                                                     | 0.4 × 0.1 × 0.1                                                                      |
| Radiation                                | Mo K $\alpha$ ( $\lambda$ = 0.71073)                                                                | Mo K $\alpha$ ( $\lambda$ = 0.71073)                                                 |
| 2 $\theta$ range for data collection/°   | 4.72 to 50.02                                                                                       | 4.696 to 50.02                                                                       |
| Index ranges                             | -19 ≤ <i>h</i> ≤ 19, -26 ≤ <i>k</i> ≤ 26,<br>-31 ≤ <i>l</i> ≤ 31                                    | -12 ≤ <i>h</i> ≤ 12, -24 ≤ <i>k</i> ≤ 23,<br>-38 ≤ <i>l</i> ≤ 38                     |
| Reflections collected                    | 31739                                                                                               | 23948                                                                                |
| Independent reflections                  | 31739 [ <i>R</i> <sub>sigma</sub> = 0.2351]                                                         | 23948 [ <i>R</i> <sub>sigma</sub> = 0.2377]                                          |
| Data/restraints/parameters               | 31739/1483/2302                                                                                     | 23948/1414/1943                                                                      |
| Goodness-of-fit on <i>F</i> <sup>2</sup> | 1.189                                                                                               | 0.998                                                                                |

|                                                |                                  |                                  |
|------------------------------------------------|----------------------------------|----------------------------------|
| Final $R$ indexes [ $I \geq 2\sigma(I)$ ]      | $R_1 = 0.1370$ , $wR_2 = 0.3610$ | $R_1 = 0.1013$ , $wR_2 = 0.2092$ |
| Final $R$ indexes [all data]                   | $R_1 = 0.2189$ , $wR_2 = 0.3935$ | $R_1 = 0.1678$ , $wR_2 = 0.2336$ |
| Largest diff. peak/hole / $e \text{ \AA}^{-3}$ | 6.05/-2.80                       | 1.24/-0.92                       |

**Table S2.** Bond lengths for **1**.

| Atom | Atom | Length/ $\text{\AA}$ | Atom | Atom | Length/ $\text{\AA}$ |
|------|------|----------------------|------|------|----------------------|
| Eu1  | O1   | 2.314(14)            | C44  | C45  | 1.40(4)              |
| Eu1  | O16  | 2.332(18)            | C45  | C46  | 1.31(4)              |
| Eu1  | O18  | 2.397(15)            | C46  | C47  | 1.49(4)              |
| Eu1  | O23  | 2.440(18)            | C47  | O19  | 1.35(3)              |
| Eu1  | O24  | 2.476(19)            | C48  | C49  | 1.49(4)              |
| Eu1  | O25  | 2.410(16)            | C48  | O19  | 1.47(3)              |
| Eu1  | O31  | 2.480(16)            | C49  | O20  | 1.41(4)              |
| Eu1  | O32  | 2.438(15)            | C50  | C51  | 1.44(4)              |
| Eu2  | O2   | 2.349(15)            | C50  | O20  | 1.43(3)              |
| Eu2  | O7   | 2.449(16)            | C51  | O21  | 1.57(4)              |
| Eu2  | O8   | 2.488(15)            | C52  | C53  | 1.51(4)              |
| Eu2  | O9   | 2.385(17)            | C52  | O21  | 1.42(4)              |
| Eu2  | O10  | 2.458(15)            | C53  | O22  | 1.47(3)              |
| Eu2  | O15  | 2.402(15)            | C54  | C55  | 1.41(4)              |
| Eu2  | O17  | 2.319(16)            | C54  | C59  | 1.44(4)              |
| Eu2  | O26  | 2.265(16)            | C54  | O22  | 1.37(4)              |
| Eu3  | O37  | 2.502(18)            | C55  | C56  | 1.27(4)              |
| Eu3  | O38  | 2.476(18)            | C56  | C57  | 1.36(4)              |
| Eu3  | O43  | 2.421(16)            | C57  | C58  | 1.38(4)              |
| Eu3  | O44  | 3.123(18)            | C58  | C59  | 1.38(4)              |
| Eu3  | O45  | 2.316(18)            | C59  | C60  | 1.43(4)              |
| Eu3  | O60  | 2.336(18)            | C60  | O23  | 1.26(3)              |
| Eu3  | O61  | 2.522(15)            | C60  | O24  | 1.26(3)              |
| Eu3  | O62  | 2.370(17)            | C61  | C62  | 1.536(18)            |
| Eu3  | O67  | 2.365(18)            | C61  | O25  | 1.35(3)              |
| Eu3  | O68  | 3.140(17)            | C61  | O26  | 1.22(3)              |
| Eu4  | O44  | 2.317(17)            | C62  | C67  | 1.36(4)              |
| Eu4  | O46  | 2.381(17)            | C64  | C65  | 1.40(4)              |
| Eu4  | O51  | 2.399(16)            | C65  | C66  | 1.35(4)              |
| Eu4  | O52  | 2.501(17)            | C66  | C67  | 1.39(4)              |
| Eu4  | O53  | 2.564(19)            | C67  | O27  | 1.39(4)              |
| Eu4  | O54  | 2.453(16)            | C68  | C69  | 1.53(4)              |

**Table S2.** Bond lengths for **1**.

| Atom | Atom | Length/Å  | Atom | Atom | Length/Å  |
|------|------|-----------|------|------|-----------|
| Eu4  | O59  | 2.447(19) | C68  | O27  | 1.50(4)   |
| Eu4  | O68  | 2.37(2)   | C69  | O28  | 1.41(4)   |
| Cu1  | Cl1  | 2.104(9)  | C70  | C71  | 1.44(5)   |
| Cu1  | Cl2  | 2.071(9)  | C70  | O28  | 1.44(4)   |
| Cu2  | Cl3  | 2.087(11) | C71  | O29  | 1.24(4)   |
| Cu2  | Cl4  | 2.124(12) | C72  | C73  | 1.53(4)   |
| Na1  | O18  | 2.45(2)   | C72  | O29  | 1.44(4)   |
| Na1  | O19  | 2.75(2)   | C73  | O30  | 1.44(3)   |
| Na1  | O20  | 2.44(2)   | C74  | C75  | 1.37(4)   |
| Na1  | O21  | 2.80(2)   | C74  | C79  | 1.42(4)   |
| Na1  | O23  | 2.30(2)   | C74  | O30  | 1.33(3)   |
| Na1  | O34  | 2.49(2)   | C75  | C76  | 1.39(4)   |
| Na2  | O2   | 2.482(16) | C76  | C77  | 1.40(4)   |
| Na2  | O3   | 2.66(2)   | C77  | C78  | 1.39(3)   |
| Na2  | O4   | 2.419(18) | C78  | C79  | 1.35(4)   |
| Na2  | O5   | 2.474(19) | C79  | C80  | 1.55(3)   |
| Na2  | O7   | 2.371(19) | C80  | O31  | 1.30(3)   |
| Na2  | O10  | 2.63(2)   | C80  | O32  | 1.23(3)   |
| Na2  | O36  | 2.31(3)   | C81  | C82  | 1.524(18) |
| Na3  | O8   | 2.77(2)   | C81  | O37  | 1.29(3)   |
| Na3  | O9   | 2.336(19) | C81  | O38  | 1.24(3)   |
| Na3  | O12  | 2.80(2)   | C82  | C83  | 1.35(4)   |
| Na3  | O13  | 2.38(2)   | C82  | C87  | 1.37(3)   |
| Na3  | O14  | 2.79(2)   | C83  | C84  | 1.40(4)   |
| Na3  | O15  | 2.41(2)   | C84  | C85  | 1.40(4)   |
| Na3  | O35  | 2.30(4)   | C85  | C86  | 1.26(4)   |
| Na4  | O25  | 2.445(19) | C86  | C87  | 1.42(4)   |
| Na4  | O27  | 2.74(3)   | C87  | O39  | 1.48(3)   |
| Na4  | O28  | 2.46(3)   | C88  | C89  | 1.49(4)   |
| Na4  | O29  | 2.62(2)   | C88  | O39  | 1.37(3)   |
| Na4  | O32  | 2.31(2)   | C89  | O40  | 1.52(4)   |
| Na4  | O33  | 2.20(4)   | C90  | C91  | 1.52(4)   |
| Na5  | O37  | 2.71(2)   | C90  | O40  | 1.37(3)   |
| Na5  | O62  | 2.34(2)   | C91  | O41  | 1.44(3)   |
| Na5  | O64  | 2.72(2)   | C92  | C93  | 1.61(4)   |
| Na5  | O65  | 2.52(2)   | C92  | O41  | 1.45(3)   |
| Na5  | O66  | 2.83(2)   | C93  | O42  | 1.39(3)   |
| Na5  | O67  | 2.58(2)   | C94  | C95  | 1.37(4)   |

**Table S2.** Bond lengths for **1**.

| Atom | Atom | Length/Å | Atom | Atom | Length/Å  |
|------|------|----------|------|------|-----------|
| Na5  | O70  | 2.28(4)  | C94  | C99  | 1.39(4)   |
| Na6  | O38  | 2.48(2)  | C94  | O42  | 1.37(3)   |
| Na6  | O41  | 2.47(2)  | C95  | C96  | 1.34(4)   |
| Na6  | O42  | 2.77(2)  | C96  | C97  | 1.37(4)   |
| Na6  | O43  | 2.40(2)  | C97  | C98  | 1.35(4)   |
| Na6  | O61  | 2.50(2)  | C98  | C99  | 1.44(4)   |
| Na6  | O69  | 2.36(3)  | C99  | C100 | 1.48(4)   |
| Na7  | O52  | 2.43(2)  | C100 | O43  | 1.24(3)   |
| Na7  | O54  | 2.23(3)  | C100 | O44  | 1.26(3)   |
| Na7  | O55  | 2.98(3)  | C101 | C102 | 1.50(4)   |
| Na7  | O56  | 2.60(3)  | C101 | O45  | 1.28(3)   |
| Na7  | O57  | 2.45(3)  | C101 | O46  | 1.29(3)   |
| Na7  | O59  | 2.95(3)  | C102 | C103 | 1.48(4)   |
| Na7  | O71  | 2.42(4)  | C102 | C107 | 1.37(4)   |
| Na8  | O46  | 2.45(2)  | C103 | C104 | 1.44(4)   |
| Na8  | O47  | 2.62(2)  | C104 | C105 | 1.30(4)   |
| Na8  | O48  | 2.47(3)  | C105 | C106 | 1.40(4)   |
| Na8  | O49  | 2.55(2)  | C106 | C107 | 1.43(4)   |
| Na8  | O50  | 2.96(2)  | C107 | O47  | 1.39(3)   |
| Na8  | O51  | 2.37(2)  | C108 | C109 | 1.50(4)   |
| Na8  | O72  | 2.37(3)  | C108 | O47  | 1.44(4)   |
| C1   | C2   | 1.36(3)  | C109 | O48  | 1.46(4)   |
| C1   | C6   | 1.38(3)  | C110 | C111 | 1.51(4)   |
| C1   | C7   | 1.50(3)  | C110 | O48  | 1.43(3)   |
| C2   | C3   | 1.45(4)  | C111 | O49  | 1.34(4)   |
| C3   | C4   | 1.32(3)  | C112 | C113 | 1.504(19) |
| C4   | C5   | 1.37(3)  | C112 | O49  | 1.428(18) |
| C4AA | C62  | 1.33(4)  | C113 | O50  | 1.42(3)   |
| C4AA | C64  | 1.43(4)  | C114 | C115 | 1.36(4)   |
| C5   | C6   | 1.31(3)  | C114 | C119 | 1.35(4)   |
| C6   | O3   | 1.43(3)  | C114 | O50  | 1.43(4)   |
| C7   | O1   | 1.33(3)  | C115 | C116 | 1.39(4)   |
| C7   | O2   | 1.22(3)  | C116 | C117 | 1.30(4)   |
| C8   | C9   | 1.58(3)  | C117 | C118 | 1.42(4)   |
| C8   | O3   | 1.44(3)  | C118 | C119 | 1.38(4)   |
| C9   | O4   | 1.37(3)  | C119 | C120 | 1.48(4)   |
| C10  | C11  | 1.42(4)  | C120 | O51  | 1.22(3)   |
| C10  | O4   | 1.39(3)  | C120 | O52  | 1.25(3)   |

**Table S2.** Bond lengths for **1**.

| Atom | Atom | Length/Å | Atom | Atom | Length/Å |
|------|------|----------|------|------|----------|
| C11  | O5   | 1.48(3)  | C121 | C122 | 1.47(4)  |
| C12  | C13  | 1.56(3)  | C121 | O53  | 1.26(3)  |
| C12  | O5   | 1.47(3)  | C121 | O54  | 1.33(3)  |
| C13  | O6   | 1.43(3)  | C122 | C123 | 1.39(4)  |
| C14  | C15  | 1.42(4)  | C122 | C127 | 1.37(4)  |
| C14  | C19  | 1.35(4)  | C123 | C124 | 1.36(4)  |
| C14  | O6   | 1.44(3)  | C124 | C125 | 1.42(4)  |
| C15  | C16  | 1.34(4)  | C125 | C126 | 1.34(4)  |
| C16  | C17  | 1.36(4)  | C126 | C127 | 1.45(4)  |
| C17  | C18  | 1.38(4)  | C127 | O55  | 1.39(4)  |
| C18  | C19  | 1.40(3)  | C128 | C129 | 1.45(4)  |
| C19  | C20  | 1.53(3)  | C128 | O55  | 1.48(3)  |
| C20  | O7   | 1.22(3)  | C129 | O56  | 1.50(4)  |
| C20  | O8   | 1.32(3)  | C130 | C131 | 1.61(4)  |
| C21  | C22  | 1.52(3)  | C130 | O56  | 1.38(4)  |
| C21  | O9   | 1.24(3)  | C131 | O57  | 1.41(3)  |
| C21  | O10  | 1.28(3)  | C132 | C133 | 1.48(4)  |
| C22  | C23  | 1.40(3)  | C132 | O57  | 1.31(4)  |
| C22  | C27  | 1.36(4)  | C133 | O58  | 1.50(4)  |
| C23  | C24  | 1.38(3)  | C134 | C135 | 1.39(4)  |
| C24  | C25  | 1.34(3)  | C134 | C139 | 1.40(4)  |
| C25  | C26  | 1.36(3)  | C134 | O58  | 1.35(3)  |
| C26  | C27  | 1.39(3)  | C135 | C136 | 1.35(4)  |
| C27  | O11  | 1.39(3)  | C136 | C137 | 1.32(4)  |
| C28  | C29  | 1.61(4)  | C137 | C138 | 1.42(4)  |
| C28  | O11  | 1.42(3)  | C138 | C139 | 1.45(4)  |
| C29  | O12  | 1.44(3)  | C139 | C140 | 1.44(4)  |
| C30  | C31  | 1.44(4)  | C140 | O59  | 1.29(3)  |
| C30  | O12  | 1.45(3)  | C140 | O60  | 1.26(3)  |
| C31  | O13  | 1.44(3)  | C141 | C142 | 1.50(4)  |
| C32  | C33  | 1.47(4)  | C141 | O61  | 1.24(3)  |
| C32  | O13  | 1.42(3)  | C141 | O62  | 1.35(3)  |
| C33  | O14  | 1.42(3)  | C142 | C143 | 1.28(4)  |
| C34  | C35  | 1.50(4)  | C142 | C147 | 1.48(4)  |
| C34  | C39  | 1.37(4)  | C143 | C144 | 1.44(4)  |
| C34  | O14  | 1.36(3)  | C144 | C145 | 1.46(4)  |
| C35  | C36  | 1.39(4)  | C145 | C146 | 1.30(4)  |
| C36  | C37  | 1.39(4)  | C146 | C147 | 1.39(4)  |

**Table S2.** Bond lengths for **1**.

| Atom | Atom             | Length/Å | Atom | Atom | Length/Å  |
|------|------------------|----------|------|------|-----------|
| C37  | C38              | 1.34(4)  | C147 | O63  | 1.38(3)   |
| C38  | C39              | 1.45(4)  | C148 | C149 | 1.468(18) |
| C39  | C40              | 1.46(4)  | C148 | O63  | 1.45(3)   |
| C40  | O15              | 1.29(3)  | C149 | O64  | 1.45(3)   |
| C40  | O16              | 1.30(3)  | C150 | C151 | 1.38(4)   |
| C41  | C42              | 1.48(4)  | C150 | O64  | 1.43(3)   |
| C41  | O17              | 1.25(3)  | C151 | O65  | 1.36(3)   |
| C41  | O18              | 1.32(3)  | C152 | C153 | 1.44(4)   |
| C42  | C43              | 1.35(4)  | C152 | O65  | 1.34(3)   |
| C42  | C47              | 1.39(4)  | C153 | O66  | 1.44(3)   |
| C43  | C44              | 1.39(4)  | C154 | C155 | 1.36(4)   |
| C158 | C159             | 1.38(4)  | C154 | C159 | 1.31(4)   |
| C159 | C160             | 1.55(4)  | C154 | O66  | 1.38(3)   |
| C160 | O67              | 1.25(3)  | C155 | C156 | 1.33(4)   |
| C160 | O68              | 1.18(3)  | C156 | C157 | 1.35(4)   |
| Cl10 | O33 <sup>1</sup> | 2.07(7)  | C157 | C158 | 1.44(4)   |

<sup>1</sup>2-X,1-Y,2-Z**Table S3.** Bond lengths for **2**.

| Atom | Atom | Length/Å  | Atom | Atom | Length/Å  |
|------|------|-----------|------|------|-----------|
| Eu1  | O57  | 2.488(11) | C48  | C49  | 1.47(2)   |
| Eu1  | O59  | 2.450(12) | C48  | O19  | 1.431(18) |
| Eu1  | O61  | 2.408(11) | C49  | O20  | 1.453(16) |
| Eu1  | O62  | 2.434(11) | C50  | C51  | 1.49(2)   |
| Eu1  | O63  | 2.484(11) | C50  | O20  | 1.396(19) |
| Eu1  | O64  | 2.416(13) | C51  | O21  | 1.445(18) |
| Eu1  | O67  | 2.397(11) | C52  | C53  | 1.450(19) |
| Eu1  | O68  | 2.522(12) | C52  | O21  | 1.451(17) |
| Eu1  | O69  | 2.398(13) | C53  | O22  | 1.387(17) |
| Eu1  | O71  | 2.454(13) | C54  | C55  | 1.479(18) |
| Al1  | O2   | 1.945(9)  | C54  | C59  | 1.360(19) |
| Al1  | O16  | 1.943(9)  | C54  | O22  | 1.301(16) |
| Al1  | O18  | 1.878(10) | C55  | C56  | 1.333(18) |
| Al1  | O23  | 1.861(10) | C56  | C57  | 1.351(19) |
| Al1  | O25  | 1.780(11) | C57  | C58  | 1.377(18) |
| Al1  | O26  | 1.946(11) | C58  | C59  | 1.410(18) |
| Al2  | O1   | 1.885(11) | C59  | C60  | 1.483(19) |
| Al2  | O7   | 1.877(11) | C60  | O23  | 1.301(16) |

**Table S3.** Bond lengths for **2**.

| Atom | Atom | Length/Å  | Atom | Atom | Length/Å  |
|------|------|-----------|------|------|-----------|
| Al2  | O9   | 1.921(11) | C60  | O24  | 1.263(17) |
| Al2  | O24  | 1.927(10) | C61  | C62  | 1.526(18) |
| Al2  | O25  | 1.821(9)  | C61  | O29  | 1.228(16) |
| Al2  | O27  | 1.969(11) | C61  | O30  | 1.242(15) |
| Al3  | O8   | 1.921(11) | C62  | C63  | 1.381(17) |
| Al3  | O10  | 1.884(10) | C62  | C67  | 1.346(19) |
| Al3  | O15  | 1.881(9)  | C63  | C64  | 1.398(17) |
| Al3  | O17  | 1.936(10) | C64  | C65  | 1.302(19) |
| Al3  | O25  | 1.840(10) | C65  | C66  | 1.368(19) |
| Al3  | O28  | 1.965(10) | C66  | C67  | 1.396(18) |
| Al4  | O29  | 1.939(9)  | C67  | O31  | 1.380(16) |
| Al4  | O44  | 1.910(10) | C68  | C69  | 1.456(18) |
| Al4  | O46  | 1.876(11) | C68  | O31  | 1.429(16) |
| Al4  | O51  | 1.868(10) | C69  | O32  | 1.414(17) |
| Al4  | O53  | 1.797(9)  | C70  | C71  | 1.50(2)   |
| Al4  | O56  | 2.002(10) | C70  | O32  | 1.443(16) |
| Al5  | O36  | 1.893(10) | C71  | O33  | 1.427(17) |
| Al5  | O38  | 1.862(9)  | C72  | C73  | 1.528(19) |
| Al5  | O43  | 1.863(9)  | C72  | O33  | 1.382(15) |
| Al5  | O45  | 1.913(10) | C73  | O34  | 1.412(17) |
| Al5  | O53  | 1.812(9)  | C74  | C75  | 1.39(2)   |
| Al5  | O55  | 1.969(10) | C74  | C79  | 1.40(2)   |
| Al6  | O30  | 1.887(9)  | C74  | O34  | 1.330(17) |
| Al6  | O35  | 1.887(10) | C75  | C76  | 1.40(2)   |
| Al6  | O37  | 1.916(9)  | C76  | C77  | 1.36(2)   |
| Al6  | O52  | 1.944(9)  | C77  | C78  | 1.374(19) |
| Al6  | O53  | 1.834(11) | C78  | C79  | 1.380(19) |
| Al6  | O54  | 1.927(10) | C79  | C80  | 1.489(18) |
| C1   | C2   | 1.49(2)   | C80  | O35  | 1.245(15) |
| C1   | O1   | 1.225(18) | C80  | O36  | 1.268(17) |
| C1   | O2   | 1.314(17) | C81  | C82  | 1.510(17) |
| C2   | C3   | 1.43(2)   | C81  | O37  | 1.248(15) |
| C2   | C7   | 1.34(2)   | C81  | O38  | 1.262(15) |
| C3   | C4   | 1.41(2)   | C82  | C83  | 1.395(18) |
| C3   | O3   | 1.33(2)   | C82  | C87  | 1.404(18) |
| C4   | C5   | 1.32(2)   | C83  | C84  | 1.386(17) |
| C5   | C6   | 1.35(2)   | C84  | C85  | 1.418(18) |
| C6   | C7   | 1.45(2)   | C85  | C86  | 1.354(18) |



**Table S3.** Bond lengths for **2**.

| Atom | Atom | Length/Å  | Atom | Atom | Length/Å  |
|------|------|-----------|------|------|-----------|
| C8   | C9   | 1.53(3)   | C86  | C87  | 1.414(16) |
| C8   | O3   | 1.392(17) | C87  | O39  | 1.329(15) |
| C9   | O4   | 1.33(2)   | C88  | C89  | 1.429(17) |
| C10  | C11  | 1.33(5)   | C88  | O39  | 1.432(15) |
| C10  | O4   | 1.55(4)   | C89  | O40  | 1.406(16) |
| C10' | C11' | 1.35(5)   | C90  | C91  | 1.45(2)   |
| C10' | O4   | 1.63(4)   | C90  | O40  | 1.415(15) |
| C11  | O5   | 1.53(4)   | C91  | O41  | 1.451(16) |
| C11' | O5'  | 1.37(4)   | C92  | C93  | 1.515(19) |
| C12  | C13  | 1.42(2)   | C92  | O41  | 1.359(18) |
| C12  | O5   | 1.338(17) | C93  | O42  | 1.360(16) |
| C12  | O5'  | 1.20(3)   | C94  | C95  | 1.406(18) |
| C13  | O6   | 1.431(18) | C94  | C99  | 1.41(2)   |
| C14  | C15  | 1.50(2)   | C94  | O42  | 1.302(16) |
| C14  | O7   | 1.255(16) | C95  | C96  | 1.336(19) |
| C14  | O8   | 1.294(16) | C96  | C97  | 1.37(2)   |
| C15  | C16  | 1.39(2)   | C97  | C98  | 1.404(18) |
| C15  | C20  | 1.41(2)   | C98  | C99  | 1.395(19) |
| C16  | C17  | 1.34(2)   | C99  | C100 | 1.508(19) |
| C16  | O6   | 1.365(18) | C100 | O43  | 1.259(15) |
| C17  | C18  | 1.36(2)   | C100 | O44  | 1.231(16) |
| C18  | C19  | 1.30(2)   | C101 | C102 | 1.54(2)   |
| C19  | C20  | 1.47(2)   | C101 | O45  | 1.278(16) |
| C21  | C22  | 1.53(2)   | C101 | O46  | 1.245(16) |
| C21  | O9   | 1.219(17) | C102 | C103 | 1.398(19) |
| C21  | O10  | 1.227(16) | C102 | C107 | 1.33(2)   |
| C22  | C23  | 1.400(19) | C103 | C104 | 1.37(2)   |
| C22  | C27  | 1.37(2)   | C104 | C105 | 1.33(2)   |
| C23  | C24  | 1.42(2)   | C105 | C106 | 1.37(2)   |
| C24  | C25  | 1.36(2)   | C106 | C107 | 1.43(2)   |
| C25  | C26  | 1.375(19) | C107 | O47  | 1.377(18) |
| C26  | C27  | 1.357(19) | C108 | C109 | 1.47(2)   |
| C27  | O11  | 1.431(17) | C108 | O47  | 1.428(18) |
| C28  | C29  | 1.511(18) | C109 | O48  | 1.311(18) |
| C28  | O11  | 1.474(16) | C110 | C111 | 1.49(2)   |
| C29  | O12  | 1.384(19) | C110 | O48  | 1.443(19) |
| C30  | C31  | 1.431(15) | C111 | O49  | 1.50(2)   |
| C30  | O12  | 1.382(16) | C112 | C113 | 1.49(2)   |

**Table S3.** Bond lengths for **2**.

| Atom Atom | Length/Å  | Atom Atom | Length/Å  |
|-----------|-----------|-----------|-----------|
| C31 O13   | 1.424(19) | C112 O49  | 1.368(18) |
| C32 C33   | 1.52(2)   | C113 O50  | 1.474(16) |
| C32 O13   | 1.415(19) | C114 C115 | 1.401(19) |
| C33 O14   | 1.434(16) | C114 C119 | 1.408(19) |
| C34 C35   | 1.372(18) | C114 O50  | 1.321(18) |
| C34 C39   | 1.446(19) | C115 C116 | 1.32(2)   |
| C34 O14   | 1.300(16) | C116 C117 | 1.359(19) |
| C35 C36   | 1.36(2)   | C117 C118 | 1.398(18) |
| C36 C37   | 1.344(19) | C118 C119 | 1.38(2)   |
| C37 C38   | 1.412(17) | C119 C120 | 1.464(19) |
| C38 C39   | 1.390(19) | C120 O51  | 1.249(17) |
| C39 C40   | 1.525(18) | C120 O52  | 1.271(16) |
| C40 O15   | 1.239(16) | C121 C122 | 1.49(4)   |
| C40 O16   | 1.221(17) | C122 O72  | 1.33(3)   |
| C41 C42   | 1.46(2)   | C123 C124 | 1.16(4)   |
| C41 O17   | 1.265(19) | C124 O74  | 1.29(4)   |
| C41 O18   | 1.256(18) | N1 O57    | 1.262(17) |
| C42 C43   | 1.42(2)   | N1 O58    | 1.200(17) |
| C42 C47   | 1.39(2)   | N1 O59    | 1.248(18) |
| C43 C44   | 1.31(2)   | N2 O60    | 1.243(16) |
| C44 C45   | 1.40(2)   | N2 O61    | 1.299(16) |
| C45 C46   | 1.39(2)   | N2 O62    | 1.224(16) |
| C46 C47   | 1.34(2)   | N3 O63    | 1.327(18) |
| C47 O19   | 1.373(18) | N3 O64    | 1.237(17) |
| N5 O70    | 1.332(19) | N3 O65    | 1.239(18) |
| N5 O71    | 1.218(19) | N4 O66    | 1.224(17) |
| N4 O68    | 1.303(19) | N4 O67    | 1.271(18) |
| N5 O69    | 1.215(18) |           |           |

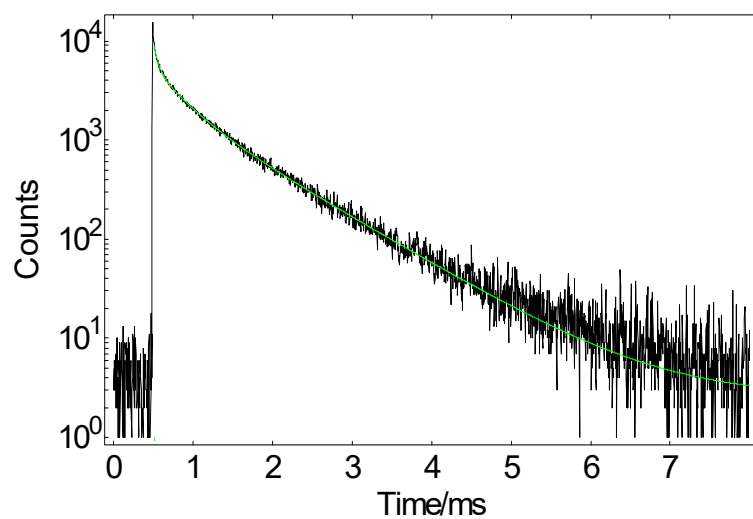

**Figure S3.** Luminescence decay kinetics of the  $\text{Eu}^{3+}$  emission (618 nm) in compound **1** under 292 nm excitation at room temperature. The green line is the fit for delay time.

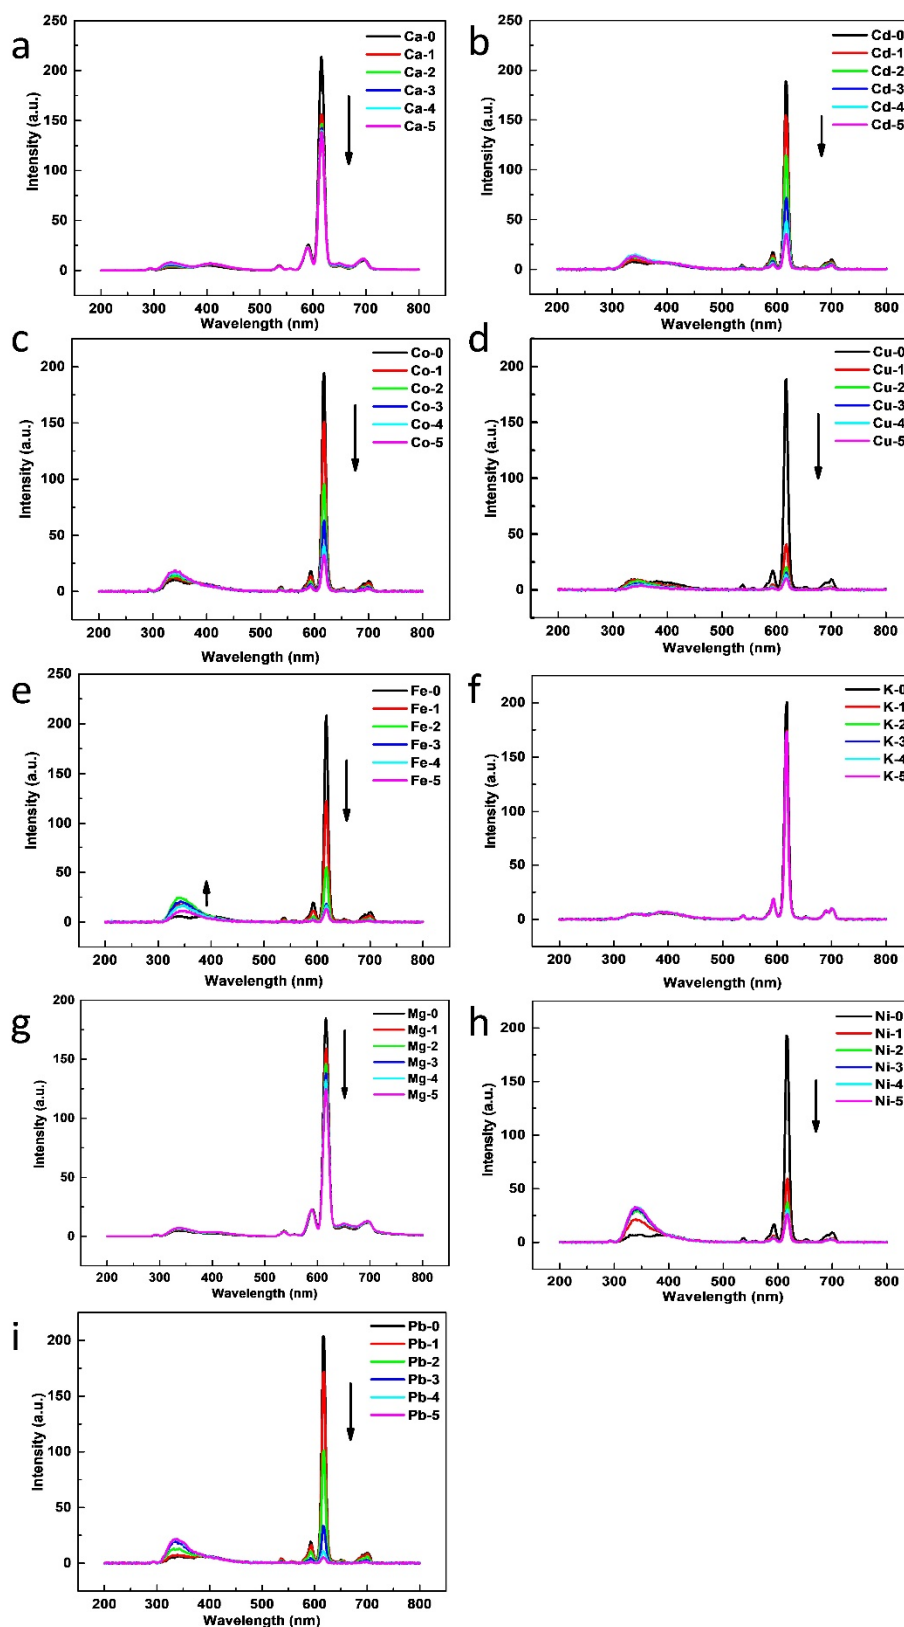

**Figure S4.** a)-i) The luminescent emission spectra (excited at 292 nm) of compound **1** in DMF upon the addition up to 2 equiv of  $\text{Ca}^{2+}$ ,  $\text{Cd}^{2+}$ ,  $\text{Co}^{2+}$ ,  $\text{Cu}^{2+}$ ,  $\text{Fe}^{3+}$ ,  $\text{K}^{+}$ ,  $\text{Mg}^{2+}$ ,  $\text{Ni}^{2+}$  and  $\text{Pb}^{2+}$  ions.

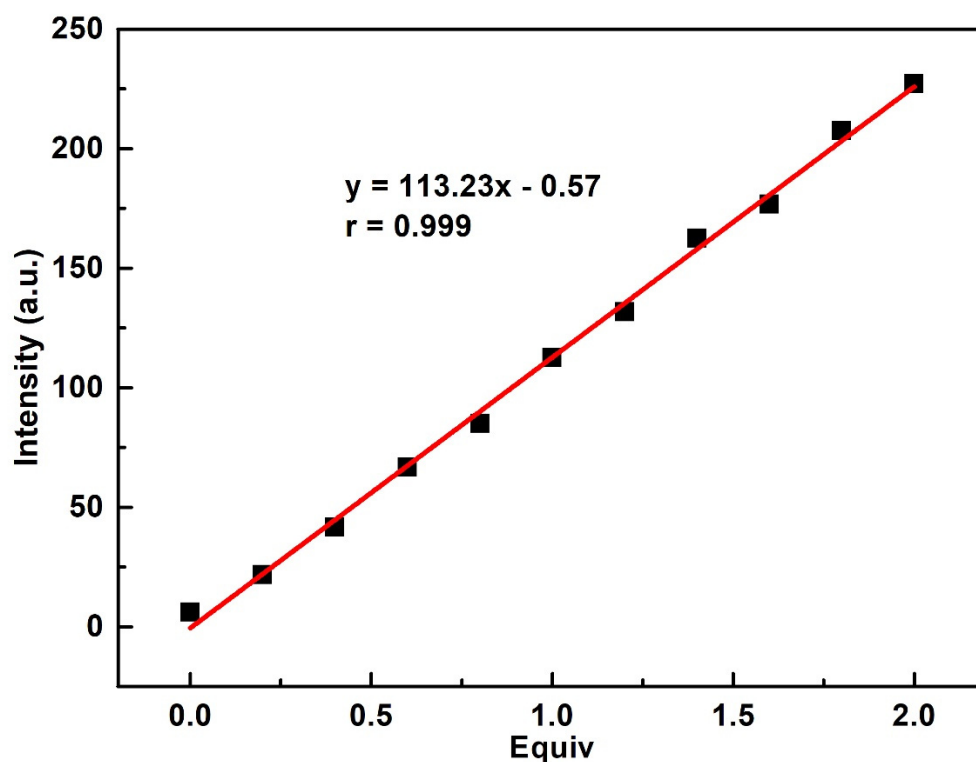

**Figure S5.** The relationship between the emission intensity at 346 nm and the equivalent addition of  $\text{Al}^{3+}$  ions. The red line indicates the linear fit.

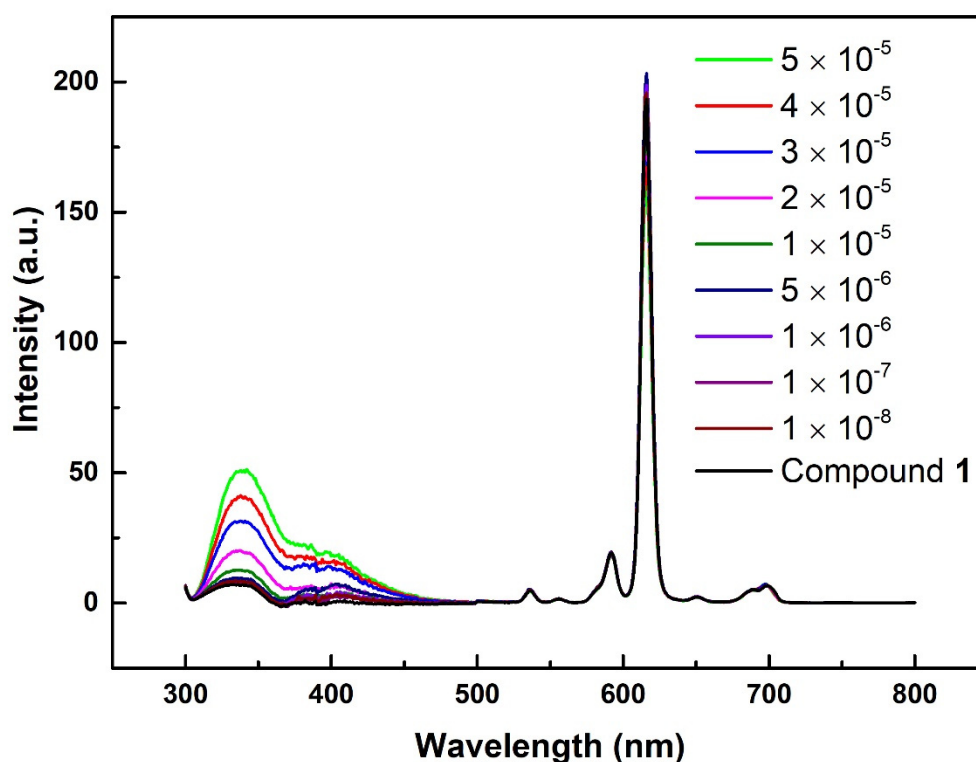

**Figure S6.** The emission spectra (excited at 292 nm) of compound **1** in DMF at room temperature in the presence of different low concentrations of  $\text{Al}^{3+}$  ions. It reveals that the detection limit of **1** for sensing  $\text{Al}^{3+}$  ions is about  $5 \times 10^{-6}$  M.

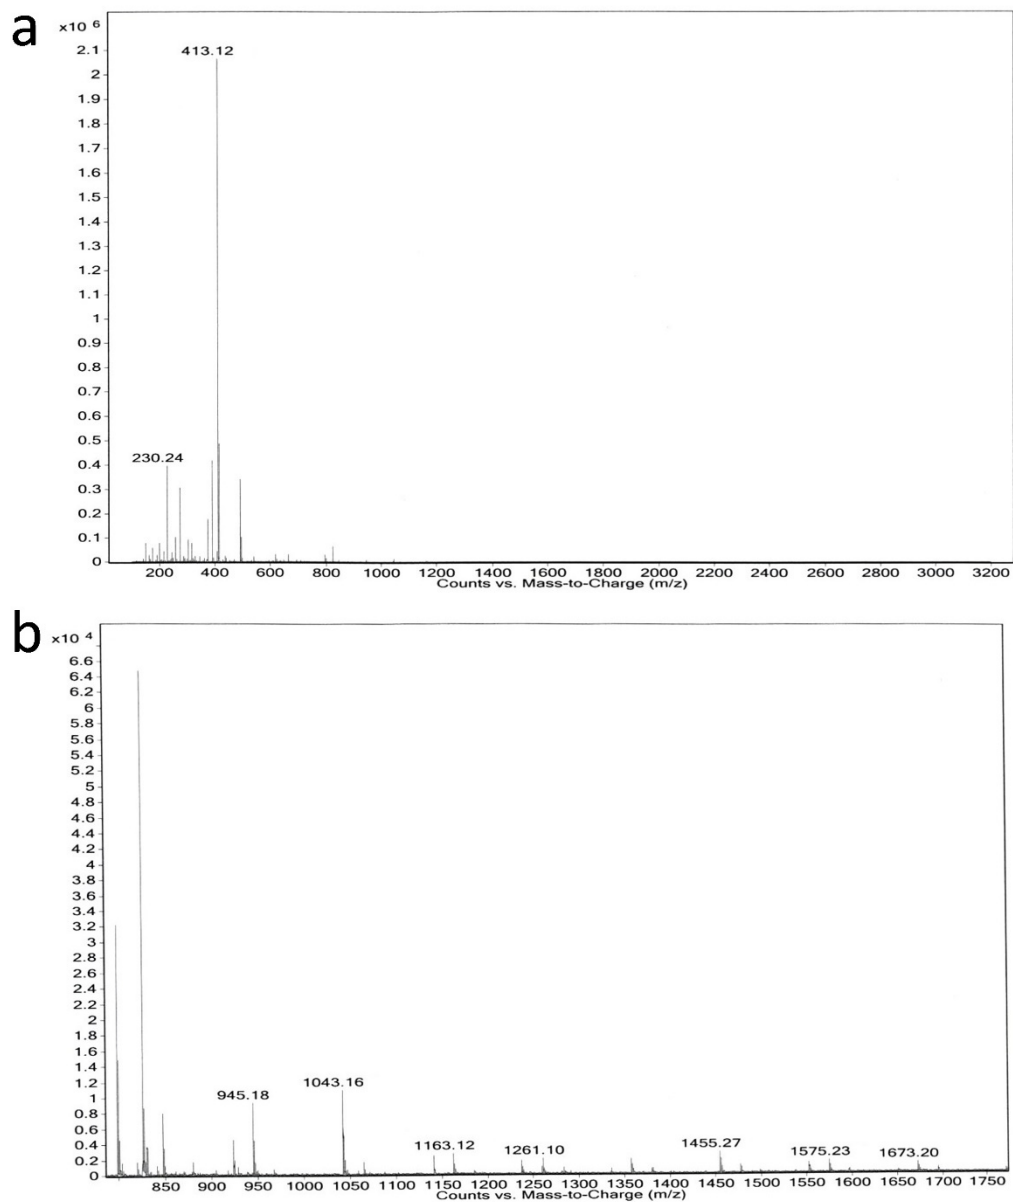

**Figure S7.** The ESI-MS of compound **1** in DMF solution. a) Full-range spectrum, b) Close-up spectrum from 800 to 1800.

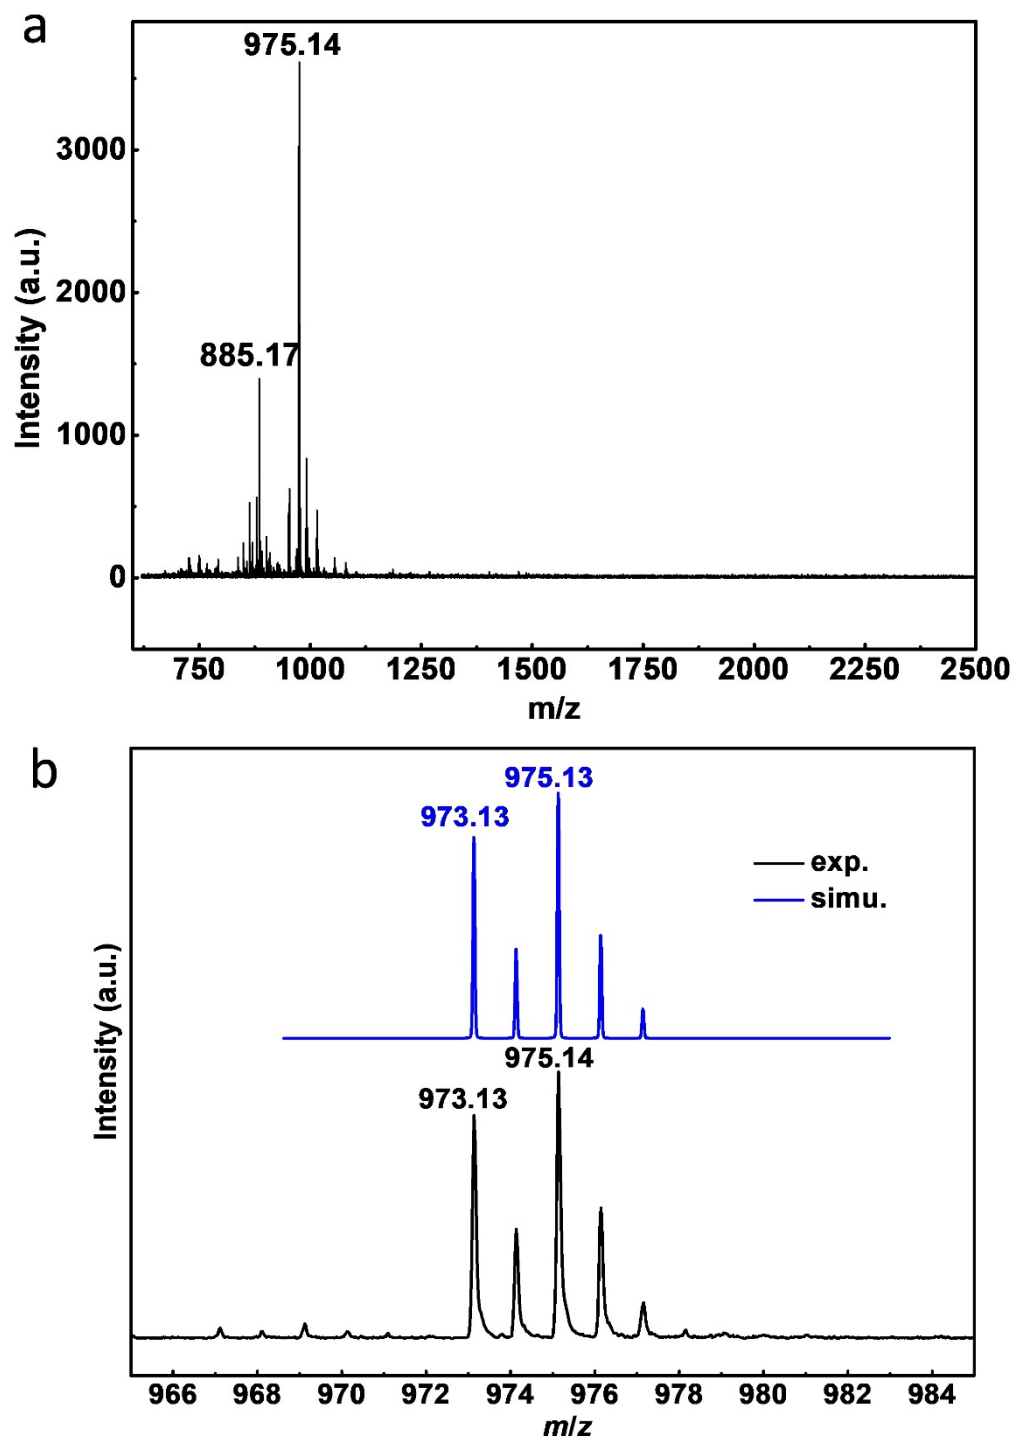

Figure S8. The MALDI-TOF of compound **1**.

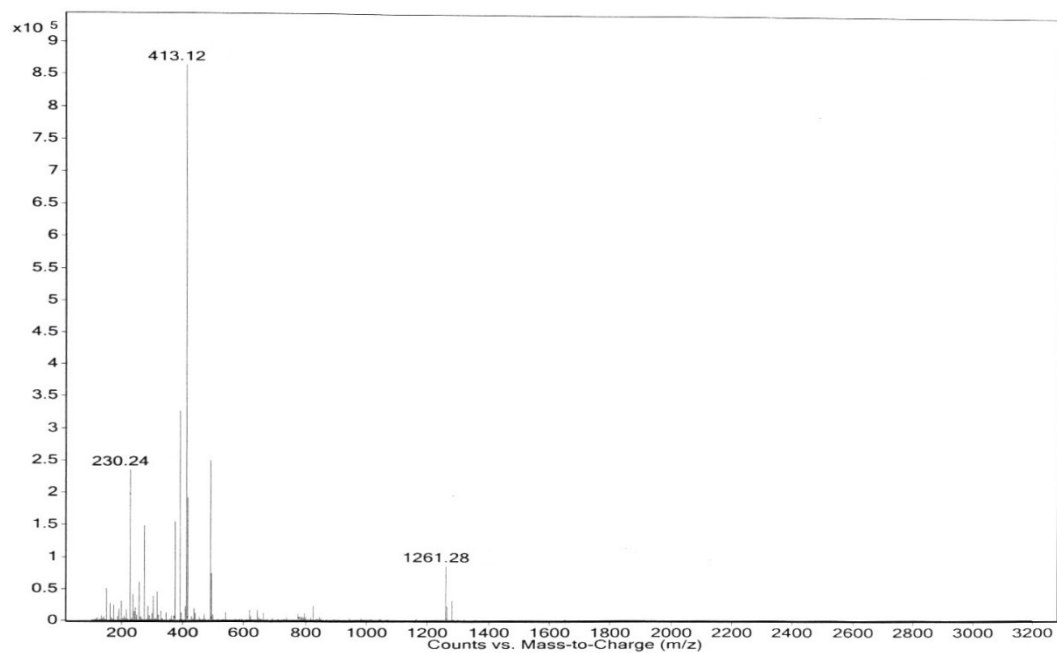

**Figure S9.** The ESI-MS of compound **1** in DMF solution after addition of  $\text{Al}^{3+}$  ions.

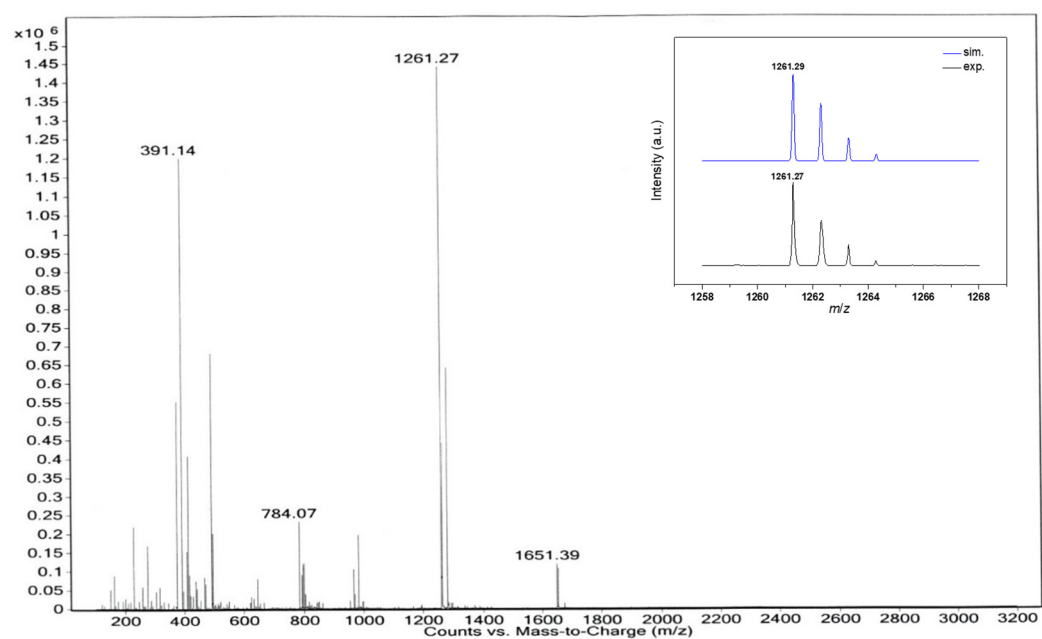

**Figure S10.** The ESI-MS of compound **2** in DMF solution.



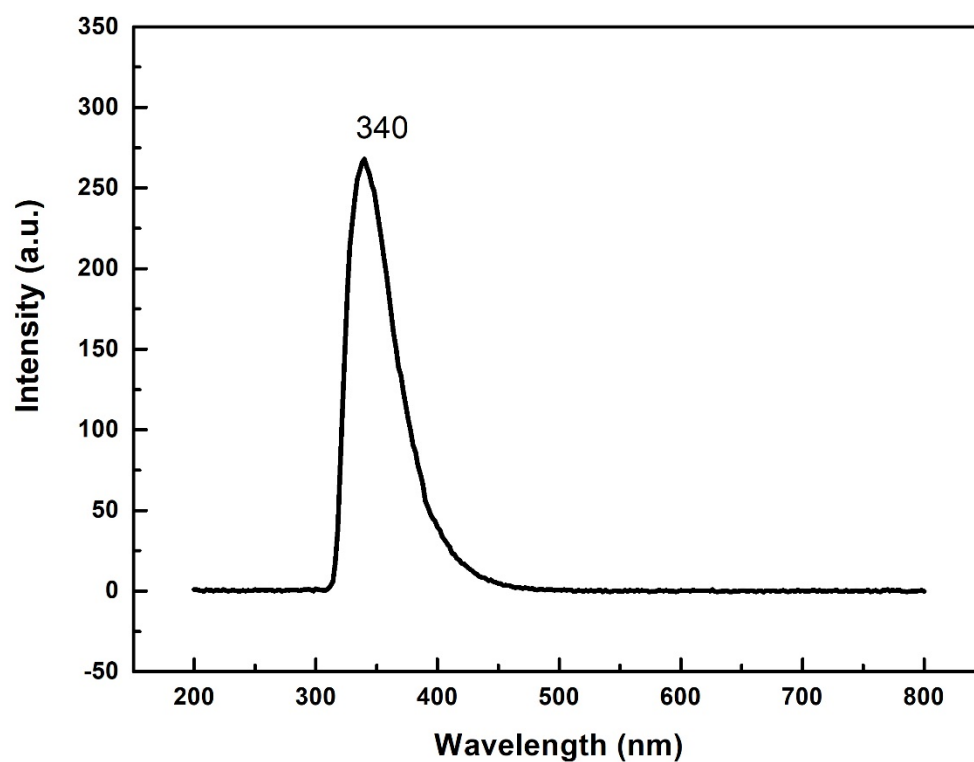

**Figure S11.** The luminescent emission spectra of ligand  $H_2TEBA$  in DMF solution with an emission peak at 340 nm.

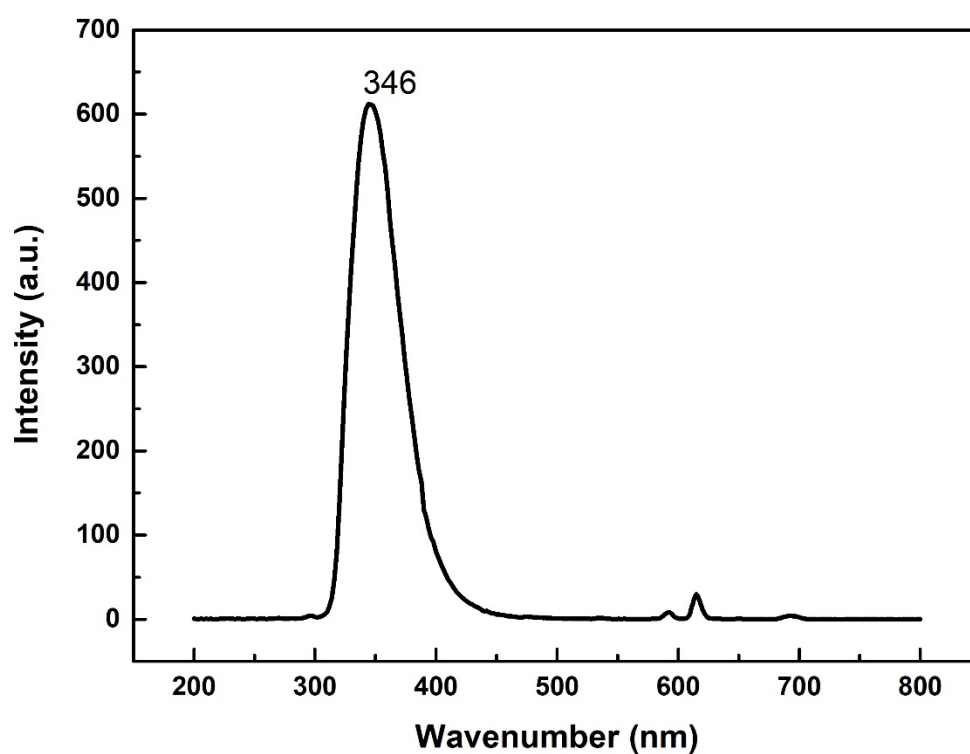

**Figure S12.** The luminescent emission spectra of compound **2** in DMF solution with a main emission peak at 346 nm.

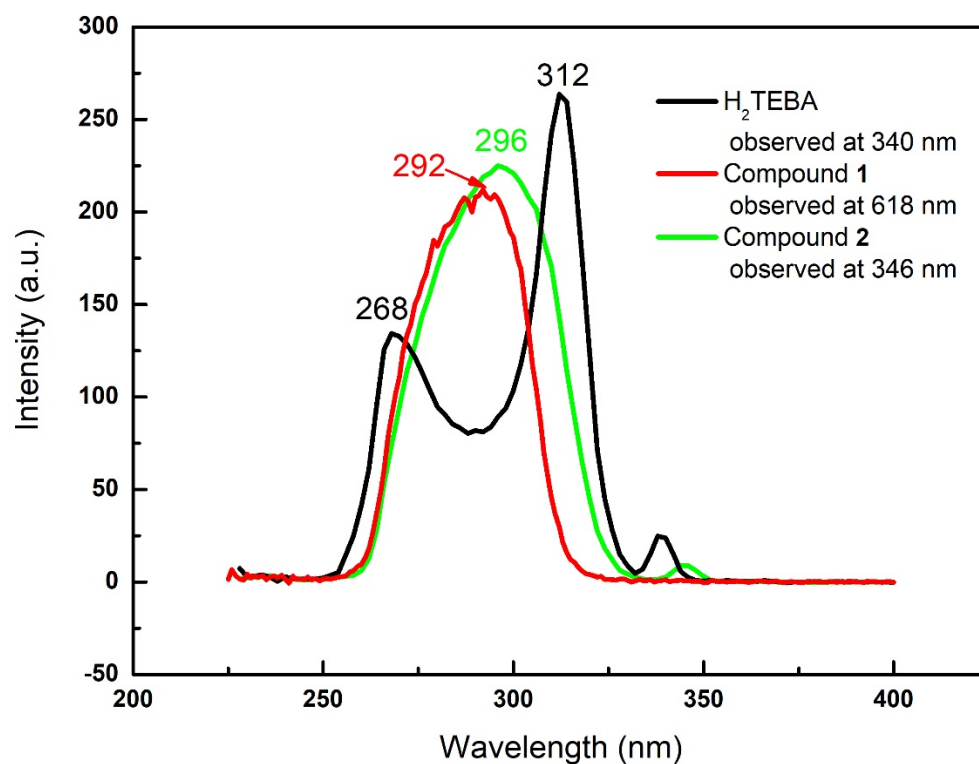

**Figure S13.** The excitation spectra of ligand H<sub>2</sub>TEBA, compound **1** and compound **2** in DMF solution observed at their highest emission peak, respectively.
